# Supplementary material
Source: bioRxiv or medRxiv preprint supplement (https://www.biorxiv.org/highwire/filestream/47160/field_highwire_adjunct_files/0/158592-1.pdf)
Supplement: Supplementary file [file 158592-1.pdf]

## Supporting Information

| Parameter           | Value      |
|---------------------|------------|
| Gaussian Height     | 0.5 kJ/mol |
| Gaussian width      | 0.1        |
| Bias Factor         | 6          |
| Gaussian Drop rate  | 6ps        |
| Swap rate           | 20ps       |
| Number of tics      | 2          |
| Feature Space       | Dihedrals  |
| Normalized Features | False      |

Table 1: Set of parameters used for the Bias-exchange tICA-Metadynamics simulations of Alanine dipeptide across 3 different FFs

| Parameter           | Value                                                                           |
|---------------------|---------------------------------------------------------------------------------|
| Gaussian Height     | 0.5 kJ/mol                                                                      |
| Gaussian width      | 0.05                                                                            |
| Bias Factor         | 6                                                                               |
| Gaussian Drop rate  | 5ps                                                                             |
| Swap rate           | 5ps                                                                             |
| Number of tics      | 2                                                                               |
| Simulation Temp     | 395 K                                                                           |
| Number of walkers   | 15/tIC                                                                          |
| Interval            | #Based upon the WW-FIP Anton dataset<br>tic_1: -1.07,1.95<br>tic_2: -12.11,1.83 |
| Feature Space       | Dihedrals + Closest Heavy atom contacts (Beta =10)                              |
| Normalized Features | True                                                                            |

Table 2: Set of parameters used for the Bias-exchange tICA-Metadynamics simulations of FIP and GTT mutants of WW domain. Each pair of tIC walkers is connected via MPI but the walkers themselves are only sharing the biases via a shared folder. For the closest heavy atom contacts, we used Plumed's definition of closest heavy atoms to make the contacts differentiable.

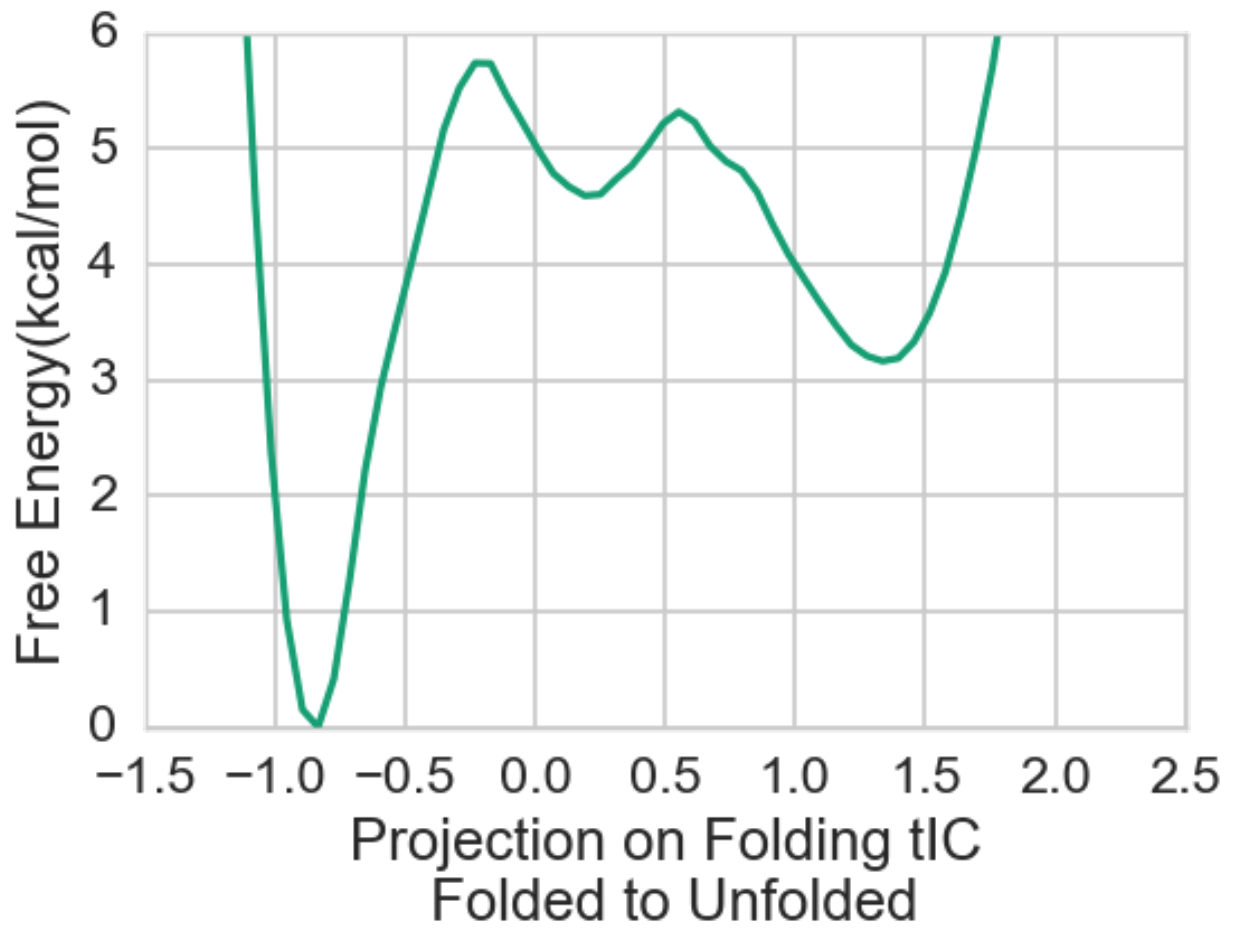

Figure 1: Anton - MSM solution to the FIP's free energy projection along the dominant tIC coordinate.
